# Supplementary material
Source: PubMed Central journal article supplement (PMC10731487)
Supplement: jama-e2322295-s002.pdf [file jama-e2322295-s002.pdf]

Measuring the Impact of AI in the Diagnosis of Hospitalized Patients Through a Randomized Vignette-Based Multicenter Study

1

|                              |                                                                                                                                        |
|------------------------------|----------------------------------------------------------------------------------------------------------------------------------------|
| TRIAL FULL TITLE             | Measuring the Impact of AI in the Diagnosis of Hospitalized Patients through a Web-based Randomized Survey Vignette Multi-Center Study |
| SAP VERSION                  | 2                                                                                                                                      |
| SAP VERSION DATE             | 6/22/2023                                                                                                                              |
| TRIAL PRINCIPAL INVESTIGATOR | Jenna Wiens, PhD<br>Michael Sjoding, MD                                                                                                |
| SAP AUTHOR(s)                | Sarah Jabbour, Michael Sjoding                                                                                                         |

2  
3  
4  
5  
6  
7  
8  
9  
10

Measuring the Impact of AI in the Diagnosis of Hospitalized Patients Through a Randomized Vignette-Based Multicenter Study

11 **Table of Contents**

12

13 Abbreviations and Definitions ..... 4

14 1 Introduction ..... 4

15 1.1 Preface ..... 4

16 1.2 Scope of the analyses ..... 4

17 2 Study Objectives and Endpoints ..... 4

18 2.1 Study Objectives ..... 4

19 2.2 Endpoints ..... 5

20 3 Study Methods ..... 5

21 3.1 General Study Design and Plan ..... 5

22 3.2 Inclusion-Exclusion Criteria and General Study Population ..... 5

23 3.3 Randomization and Blinding ..... 6

24 3.4 Study Assessments ..... 7

25 4 Sample Size ..... 7

26 5 General Analysis Considerations ..... 11

27 5.1 Timing of Analyses ..... 11

28 5.2 Analysis Populations ..... 11

29 5.2.1 Full Analysis Population (or Intention to Treat or Modified Intention to Treat) ..... 11

30 5.2.2 Per Protocol Population ..... 11

31 5.2.3 Safety Population ..... 11

32 5.3 Covariates and Subgroups ..... 11

33 5.3.1 Multi-center Studies ..... 11

34 5.4 Missing Data ..... 11

35 5.5 Interim Analyses and Data Monitoring (as applicable) ..... 11

36 5.5.1 Purpose of Interim Analyses ..... 12

37 5.5.2 Planned Schedule of Interim Analyses ..... 12

38 5.5.3 Scope of Adaptations ..... 12

39 5.5.4 Stopping Rules ..... 12

40 5.5.5 Analysis Methods to Minimize Bias ..... 12

41 5.5.6 Adjustment of Confidence Intervals and p-values ..... 12

42 5.5.7 Interim Analysis for Sample Size Adjustment ..... 12

43 5.5.8 Practical Measures to Minimize Bias ..... 12

44 5.5.9 Documentation of Interim Analyses ..... 12

45 5.6 Multiple Testing ..... 12

Measuring the Impact of AI in the Diagnosis of Hospitalized Patients Through a Randomized Vignette-Based Multicenter Study

46 6 Summary of Study Data ..... 12

47 6.1 Subject Disposition ..... 13

48 6.2 Derived variables ..... 13

49 6.3 Protocol Deviations ..... 13

50 6.4 Demographic and Baseline Variables ..... 14

51 6.5 Concurrent Illnesses and Medical Conditions ..... 14

52 6.6 Treatment Compliance ..... 14

53 7 Efficacy Analyses ..... 14

54 7.1 Primary Efficacy Analysis ..... 14

55 7.2 Secondary Efficacy Analyses ..... 14

56 7.2.1 Secondary Analyses of Primary Efficacy Endpoint ..... 15

57 7.2.2 Analyses of Secondary Endpoints ..... 15

58 7.3 Exploratory Efficacy Analyses ..... 15

59 8 Safety Analyses ..... 15

60 8.1 Extent of Exposure ..... 15

61 8.2 Adverse Events ..... 15

62 8.3 Deaths, Serious Adverse Events and other Significant Adverse Events ..... 15

63 8.4 Pregnancies (As applicable) ..... 15

64 8.5 Clinical Laboratory Evaluations ..... 15

65 8.6 Prior and Concurrent Medications (As applicable) ..... 15

66 8.7 Other Safety Measures ..... 15

67 9 Pharmacokinetics (As Applicable) ..... 15

68 10 Other Analyses ..... 15

69 11 Reporting Conventions ..... 16

70 12 Quality Assurance of Statistical Programming (As Applicable) ..... 16

71 13 References ..... 16

72

73

74

75

76

77

78

Measuring the Impact of AI in the Diagnosis of Hospitalized Patients Through a Randomized  
Vignette-Based Multicenter Study79 **Abbreviations and Definitions**  
80  
81

|      |                                       |
|------|---------------------------------------|
| AE   | Adverse Event                         |
| ARF  | Acute Respiratory Failure             |
| CRF  | Case Report Form                      |
| COPD | Chronic Obstructive Pulmonary Disease |
| IMP  | Investigational Medical Product       |
| SAP  | Statistical Analysis Plan             |

82  
83 **1 Introduction**84 **1.1 Preface**

85 Artificial intelligence (AI) has achieved high accuracy at identifying abnormalities in clinical images,  
86 such as pneumonia from chest radiographs, diabetic retinopathy from fundus images, or skin cancer  
87 from histopathology images.<sup>10-12</sup> However, systematic bias in AI models can lead to inaccurate  
88 predictions for entire subpopulations.<sup>13-15</sup> When presented with such incorrect predictions, physician  
89 performance can be harmed<sup>16</sup> due to automation bias,<sup>17</sup> which is especially concerning in safety-  
90 critical settings. Thus, the extent to which AI can be safely integrated into clinical workflows and to  
91 support diagnostic decisions is still unknown.

92  
93 This study aims to provide insight into the effectiveness of providing clinicians with image-based AI  
94 model explanations to help them catch when models are making incorrect decisions.

95 **1.2 Scope of the analyses**

96 These analyses will primarily assess the extent to which showing clinicians systematically biased AI  
97 model predictions and explanations improves their diagnostic accuracy after reviewing clinical  
98 vignettes of patients with acute respiratory failure and determining the patient's likely diagnosis  
99 compared to the setting where clinicians are shown biased AI model predictions without  
100 explanations.

101 **2 Study Objectives and Endpoints**102 **2.1 Study Objectives**103 Survey Data Collection Phase104 *Objectives*

- 105 • To determine clinician accuracy in diagnosing pneumonia, heart failure, and chronic  
106 obstructive pulmonary disease (COPD) after reviewing clinical vignettes of patients with  
107 acute respiratory failure (ARF) without any AI model input.
- 108 • To determine how AI model predictions without explanations affect clinician accuracy in  
109 diagnosing pneumonia, heart failure, and COPD in a patient population with ARF.

Measuring the Impact of AI in the Diagnosis of Hospitalized Patients Through a Randomized Vignette-Based Multicenter Study

- 110 • To determine how standard AI model predictions with explanations affect clinician accuracy
- 111 in diagnosing pneumonia, heart failure, and COPD in a patient population with ARF.
- 112 • To determine how intentionally biased AI model predictions without explanations affect
- 113 clinician accuracy in diagnosing pneumonia, heart failure, and COPD in a patient population
- 114 with ARF?
- 115 • To determine how do intentionally biased AI model predictions with explanations affect
- 116 clinician accuracy in diagnosing pneumonia, heart failure, and COPD in a patient population
- 117 with ARF.

118 **2.2 Endpoints**

119 Primary endpoints

- 120 • Clinician diagnostic accuracy for identify the cause of ARF after reviewing clinical vignettes
- 121 during following settings
- 122 ○ Clinicians provided no AI model predictions
- 123 ○ Clinicians provided standard AI model predictions without explanations
- 124 ○ Clinicians provided standard AI model predictions with explanations
- 125 ○ Clinicians provided biased AI model predictions without explanations
- 126 ○ Clinicians provided biased AI model predictions with explanations

127

128 Secondary endpoints

- 129 • Accuracy of treatment selection in the above settings

130 **3 Study Methods**

131 **3.1 General Study Design and Plan**

- 132
- 133 • Study configuration and experimental design: This study is a block randomized web-based
- 134 survey clinical vignette study
- 135 • Type of Comparison: Clinician diagnostic accuracy when provided AI model predictions with
- 136 explanations versus AI model without explanation
- 137 • Type of control(s): no AI model, AI model with predictions alone.
- 138 • Level and method of blinding (e.g. double-blind): Single blind study (clinicians are unaware
- 139 they are randomized to see AI model with or without predictions)
- 140 • Method of treatment assignment: Survey participant level randomization
- 141 • At what point in time subjects are randomized relative to treatments, events and study
- 142 periods: Participants are randomized after survey initiation
- 143 • Sequence and duration of all study periods: The survey is anticipated to take an average of
- 144 20 minutes to complete.
- 145

146 **3.2 Inclusion-Exclusion Criteria and General Study Population**

147 (ICH E3;9.3. ICH E9;2.2.1)

148

149 Inclusion Criteria

Measuring the Impact of AI in the Diagnosis of Hospitalized Patients Through a Randomized Vignette-Based Multicenter Study

To be eligible to participate in this study, a participant must answer “Yes” to the following question:

150

151

152

“Do you hold any of the following roles on a healthcare team, or any similar roles?”

153

- Nurse Practitioner (NP)

154

- Physician Assistant

155

- Resident

156

- Fellow

157

- Attending Physician

158

159 **3.3 Randomization and Blinding**

160

161

**Overview**

162

**Randomizations**

(1) → Explanation, No Explanation

(2) → Bias: Age, BMI, Preprocessing

(3) Vignette ordering

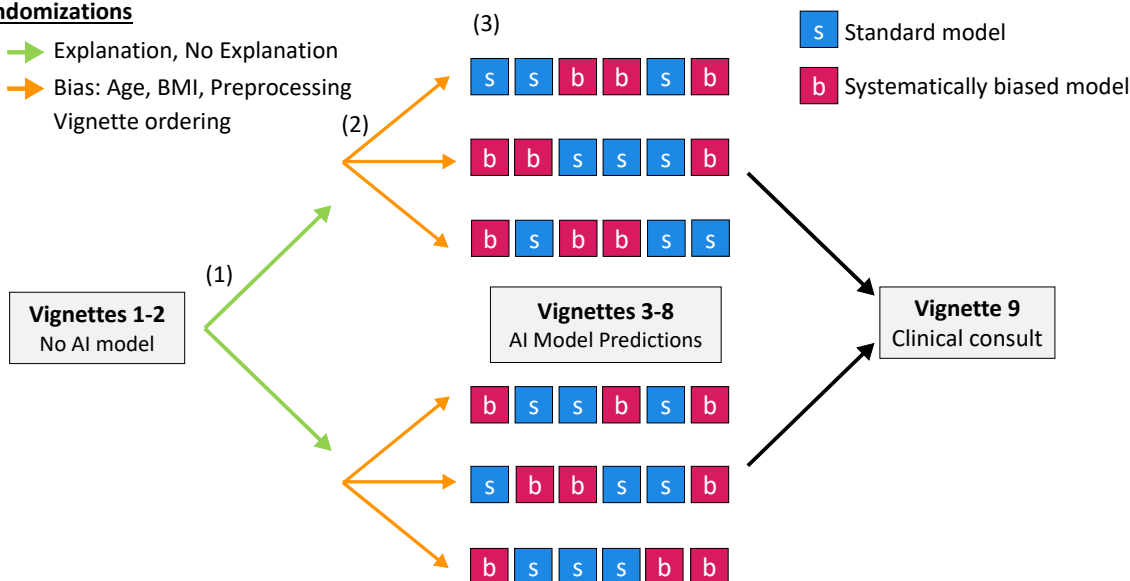

163

164 **Figure 1. Survey flow and randomization** After confirming study eligibility and consent, participants  
 165 will complete two baseline clinical vignettes where they review patient clinical data and then  
 166 determine whether the patient has heart failure, pneumonia, and/or COPD without any AI model  
 167 predictions (Vignettes 1-2). All participants are then randomized to (1; green arrows) AI model  
 168 predictions with or without model explanations, (2; orange arrows) one of three types of biased AI  
 169 models shown (biased based on age, BMI, or preprocessing features), and (3; purple boxes) the  
 170 ordering of the 6 clinical vignettes where 3 standard model predictions and 3 systematically biased  
 171 model predictions were shown with the clinical vignette. All participants are shown a ninth vignette  
 172 (vignette 9), which features a clinical consult. The clinical consult provides includes a short block of  
 173 text providing a prediction and explanation for the patient’s likely diagnosis from a hypothetical  
 174 trusted colleague.

175

176 Details of block randomization.

## Measuring the Impact of AI in the Diagnosis of Hospitalized Patients Through a Randomized Vignette-Based Multicenter Study

177

178 Block randomization was used to determine the specific patient vignettes and the order of vignettes  
179 that subjects would see during the survey. Block randomization was performed in blocks of 90 to  
180 achieve all three randomizations described in Figure 1. This ensured that all 45 patient vignettes  
181 would be evenly assigned across the first two baseline vignettes and the last clinical consult vignette,  
182 and to ensure that a subject would only see a clinical vignette once during the survey. Within the  
183 blocks of 90, 30 subjects were randomly assigned to each of the three AI model bias types (age, BMI,  
184 or preprocessing features). There were 6 specific clinical vignettes where the AI model displayed the  
185 biased behavior for each bias type. Therefore, for the 30 subjects randomly assigned to a specific  
186 bias types, 3 of the 6 specific vignettes where the AI model displayed the specific biased behavior  
187 was randomly assigned to the subject. An additional 3 vignettes from the 45 total vignettes were  
188 randomly selected to be shown with standard model predictions. These 6 patient vignettes (3 with  
189 standard AI model, 3 with biased AI model) were then displayed in random order. After the  
190 randomization blocks of 90 subjects were generated, carefully tested was performed to ensure all  
191 specifications were met.

192

### 193 3.4 Study Assessments

194

195 The study is designed to take on average 20 minutes per participant. The participant can exit out of  
196 the survey and return within two weeks to continue. After the two weeks, the survey is closed and  
197 the participant can no longer continue the survey.

198

199 Participants will be asked to rate the independent likelihoods that pneumonia, heart failure, and  
200 COPD are contributing to the patient's ARF on a scale of 0-100. They will be instructed that patients  
201 can have one, more than one, or none of these diagnoses. Clinician diagnostic accuracy will be  
202 determined by comparing their answer to an independent assessment of each patients likely  
203 diagnosis performed by an panel of clinician reviewers.

## 204 4 Sample Size

205

206 The sample size calculation is based on the primary endpoint of clinician diagnostic accuracy for  
207 pneumonia, heart failure, and COPD. We performed sample size calculations to ensure we would  
208 have adequate power to detect both a reduction in diagnostic accuracy when clinicians were shown  
209 a biased model, assuming they would follow the biased model's recommendations 50% of the time,  
210 and adequate power to detect an improvement in accuracy when clinicians were shown a biased  
211 model and explanations, assuming they would follow the biased model recommendation 25% of the  
212 time when also shown the explanation. These assumptions would translate into decrease in  
213 diagnostic accuracy by 20% when clinicians were shown a biased model and a 10% improvement  
214 when shown a biased model and explanation. We used a generalized linear mixed model with a  
215 0.001 significance level. Given the simulated data generated as further described below, we fit a  
216 generalized linear mixed model in R to measure if the recovery of clinician diagnostic accuracy when  
217 shown the model explanation was significantly different compared to the clinician diagnostic  
218 accuracy when shown a biased model alone. We performed 100 simulated studies at each sample  
219 size level, and calculated power as the percentage of time a statistically significant difference was  
220 measured. We found that the study would have very high power to detect a difference in diagnostic  
221 accuracy when comparing clinician baseline diagnostic accuracy and clinician accuracy when shown a

Measuring the Impact of AI in the Diagnosis of Hospitalized Patients Through a Randomized Vignette-Based Multicenter Study

222 biased AI model. The power calculation illustrated in the figure below describes the sample size  
 223 needed to detect a difference in diagnostic accuracy when clinicians shown a biased AI model alone  
 224 and when clinicians are shown a biased AI model with explanation.  
 225

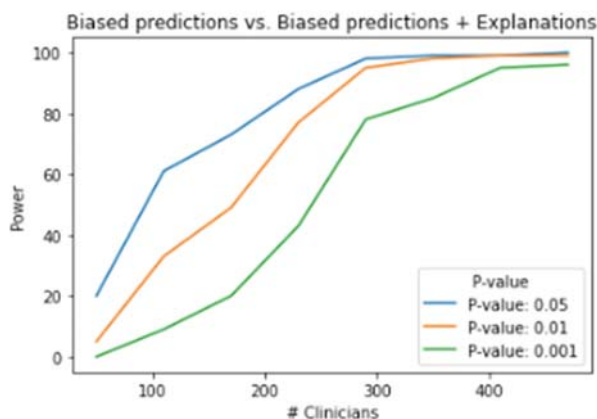

226  
 227

228 **Detailed sample size calculation:**

229

230 For our simulation, we model the likelihood that a study subject gets a diagnosis correct as a  
 231 combination of their baseline diagnostic accuracy ( $b$ ), the difficulty of the patient case ( $d$ ), the skill  
 232 of the clinician ( $c$ ), and the effect of either being shown an AI model prediction alone ( $\beta_1$ ) or being  
 233 shown an AI prediction with an explanation ( $\beta_2$ ), where  $AI\_Alone$  and  $AI\_Explanation$  are  
 234 indicator variables and  $\sigma(\cdot)$  denotes the sigmoid function. Details of each of the variables  
 235 represented in the equation are described in more detail below.  
 236

$$p = \text{sigmoid}(b + d + c + \beta_1 AI\_Alone + \beta_2 AI\_Explanation)$$

237

238  
 239 Then, during the simulation, whether a clinician obtains the correct diagnosis is determined by  
 240 drawing a random variable from a Bernoulli distribution of probability  $p$ , with probability determined  
 241 based on the above data generation model.  
 242

243

243 Sample size for the study was determined by performing by 100 simulations at participant sample  
 244 sizes of 50 to 550, in increments of 50, using the above equation to model the data generating  
 245 process in the survey. In each simulation, a clinician is shown 2 vignettes with no AI model input and  
 246 then shown either 3 vignettes with systematically biased AI model without explanations or 3  
 247 vignettes with systematically biased AI model with explanations. We simulate 100 of these studies at  
 248 each sample size level.  
 249

250

250 During a simulated study, we generate blocks of vignettes to assign to hypothetical subjects by the  
 251 combinations of (1) whether they were shown an AI model explanation, and (2) the type of  
 252 systematic bias seen. This generates 6 possible assignments:  
 253

254

- 254 1. AI model with Pneumonia bias, no explanation
- 255 2. AI model with Pneumonia bias, explanation
- 256 3. AI model with Heart failure bias, no explanation



Measuring the Impact of AI in the Diagnosis of Hospitalized Patients Through a Randomized Vignette-Based Multicenter Study

- 257 4. AI model with Heart failure bias, explanation
- 258 5. AI model with COPD bias, no explanation
- 259 6. AI model COPD bias, explanation

260  
 261 For every hypothetical clinician in the study, we then assign them one of the above conditions (in  
 262 order) and then generate the likelihood that the participant gets the diagnosis correct based on the  
 263 data generation model. For example, the first clinician (assigned to 1), is shown 2 clinical vignettes  
 264 without an AI model and 3 vignettes of a biased AI model with pneumonia bias and no explanation.  
 265 The clinician’s diagnostic accuracy for each of these clinical vignettes was determined using the data  
 266 generating model.

267  
 268 Details of the generative model parameters:

269  
 270 1. Baseline diagnostic accuracy

271  
 272 Average baseline diagnostic accuracy for clinicians was assumed to be 0.7 across all three diagnoses  
 273 but then updated after calculating baseline accuracy at an interim analysis (see 8.5). Accuracy at the  
 274 interim analysis was determined to be:

- 275 a. Pneumonia: 0.68
- 276 b. Heart Failure: 0.72
- 277 c. COPD: 0.82

278 These probabilities are transformed to log odds for the data generation model, i.e.,  $\text{logit}(x)$ .

- 279  
 280 • If the participant is randomized to see the Pneumonia bias, then  
 281 
$$b = \text{logit}(0.68) = 0.75$$
 282
- 283 • If the participant is randomized to see the heart failure bias, then  
 284 
$$b = \text{logit}(0.72) = 0.94$$
 285
- 286 • If the participant is randomized to see the COPD bias, then  
 287 
$$b = \text{logit}(0.82) = 1.5$$
 288

289 2. Draw Clinician skill  $c_i$

290  
 291 We assumed variation in clinician skill was a normally distributed random variable with mean  
 292  $\mu_{clinician} = 0$ . We assumed the best clinician, who was 2 standard deviations better than average  
 293 clinician, got the average case right 90% of the time, then  $\sigma_{clinician} = \frac{\text{logit}(t) - \text{logit}(x)}{2}$ .

294  
 295 For each clinician  $c_i$ , their skill level is drawn:

296  
 297 
$$c_i \sim N(0, \sigma_{clinician}) \text{ for } i = 1, 2, \dots, n; \text{ where } n \text{ is the number of clinicians in the simulation}$$
 298

299  
 300 3. Draw clinical vignette simplicity  $d_j$

301 We assumed variation exists in clinical vignette diagnostic difficulty, such that cases that are 1 std.  
 302 easier to diagnosis than the average vignette are answered correctly 90% of the time. Case  
 303 diagnostic difficulty was assumed to be a normally distributed random variable with mean  $\mu_{case} = 0$

Measuring the Impact of AI in the Diagnosis of Hospitalized Patients Through a Randomized Vignette-Based Multicenter Study

304 and std.  $\sigma_{case} = \text{logit}(z) - \text{logit}(x)$ , where  $z = 0.9$ , and  $x = \{0.68, 0.72, \text{ and } 0.82\}$  for the three  
 305 diagnoses.

306  
 307 For each case  $d_j$ , the case simplicity is drawn:

308  
 309 
$$d_j \sim N(0, \sigma_{case})$$

310  
 311  
 312 3. Draw the Impact of a systematically biased AI model

313 We assumed that a systematically biased AI model prediction would reduce clinician diagnostic  
 314 accuracy by  $a$ . Therefore, if average diagnostic accuracy was  $x$ , the impact of a systematically biased  
 315 AI model on accuracy is  $(x - a)\%$ . We assumed participants would listen to the AI model 50% of the  
 316 time, which meant that  $x - a = x * 0.5 + 0.33 * 0.5$ . In the data generation model, an indicator  
 317 variable was included indicating whether clinicians were shown a systematically biased AI model  
 318 with coefficient  $\beta_1$ . When  $\beta_1 < 0$ , this variable represents a decrease in the likelihood that the  
 319 clinician will get a case correct. It is the difference between the likelihood that the participant gets  
 320 the case correct with the AI input minus the likelihood that the participant gets the case correct  
 321 without AI model input:  $\beta_1 = \text{logit}(x - a) - \text{logit}(x)$ .

322  
 323 In the simulation, if the participant was shown the AI model for the vignette, then

- 324
- 325 • If the participant is randomized to see the Pneumonia bias, then  
 326 
$$\beta_1 = \text{logit}(0.68 * .5 + 0.33 * 0.5) - \text{logit}(0.68) = -0.73$$
  
 327
  - 328 • If the participant is randomized to see the heart failure bias, then  
 329 
$$\beta_1 = \text{logit}(0.72 * .5 + 0.33 * 0.5) - \text{logit}(0.72) = -0.84$$
  
 330
  - 331 • If the participant is randomized to see the COPD bias, then  
 332 
$$\beta_1 = \text{logit}(0.82 * .5 + 0.33 * 0.5) - \text{logit}(0.82) = -1.2$$
  
 333

334 Impact of a systematically biased AI model with explanation

335 We assumed that providing an AI model explanation helps clinicians recover diagnostic accuracy by  $r$   
 336 when shown a biased AI model that reduce their accuracy by  $a$ . Therefore, if accuracy on an average  
 337 case was  $x$ , the impact of showing a biased AI model and explanation is  $((x-a) + r)\%$ . We assumed  
 338 that participants would recover 50% back to their baseline diagnostic accuracy, which means  $((x-a) +$   
 339  $r)\% = (x - a + 0.5a)\% = x * 0.75 + 0.33 * 0.25$ . In the data generation model, an indicator variable  
 340 was included indicating whether clinicians were shown a systematically biased AI model explanation  
 341 with coefficient  $\beta_2$ .  $\beta_2$  represents the change in likelihood that the clinician gets the case correct.  
 342 When  $\beta_2 > 0$ , this variable represents an increase in the likelihood that the clinician gets the case  
 343 correct:  $\beta_2 = \text{logit}(x - a + r) - \text{logit}(x - a)$ .

344  
 345 In the simulation, if the participant was shown the AI model for the vignette, then

- 346
- 347 • If the participant is randomized to see the Pneumonia bias, then  
 348 
$$\beta_2 = \text{logit}(0.68 - 0.25 + 0.1) - \text{logit}(0.68) = -0.38$$
  
 349
  - 350 • If the participant is randomized to see the heart failure bias, then

Measuring the Impact of AI in the Diagnosis of Hospitalized Patients Through a Randomized  
Vignette-Based Multicenter Study

351 
$$\beta_1 = \text{logit}(0.72 - 0.25 + 0.1) - \text{logit}(0.68) = -0.44$$

352

- 353 • If the participant is randomized to see the COPD bias, then

354 
$$\beta_1 = \text{logit}(0.82 - 0.24 + 0.1) - \text{logit}(0.68) = -0.68$$

355

356 **5 General Analysis Considerations**

357 **5.1 Timing of Analyses**

358 The final analysis will be performed two weeks after the last study email invitation is sent out and  
359 400 participants have completed the study.

360

361 **5.2 Analysis Populations**

362

363 **5.2.1 Full Analysis Population (or Intention to Treat or Modified Intention to Treat)**

- 364 • All subjects who consent to taking the study and click to the first page of the study. Each  
365 participant who does so is randomized.

366 **5.2.2 Per Protocol Population**

- 367 • NA

368 **5.2.3 Safety Population**

- 369 • NA

370

371 **5.3 Covariates and Subgroups**

372 Because all participants are randomized approximately equally across treatment groups, we do not  
373 anticipate any covariates that will have an importance influence on our primary endpoints.

374 There are no *a priori* hypotheses of subgroup differences.

375

376 **5.3.1 Multi-center Studies**

377 This is a multi-center study, where participant responses will be pooled from all centers. The rationale  
378 behind this is that we assume there is no meaningful center differences in treating patients with  
379 ARF.

380

381 **5.4 Missing Data**

382 The main source of missing data will be missing demographic information in participants who do not  
383 complete all vignettes and the demographic questions after the survey. We assume this data will be  
384 missing at random. Because this demographic information is not included as covariates in any of the  
385 analysis, we do not plan to do anything to impute missing demographics data.

386

387 **5.5 Interim Analyses and Data Monitoring (as applicable)**

Measuring the Impact of AI in the Diagnosis of Hospitalized Patients Through a Randomized  
Vignette-Based Multicenter Study

388 **5.5.1 Purpose of Interim Analyses**

389 No interim analyses of the exposure variables will be conducted (ie the impact of AI models on  
390 clinician diagnostic accuracy), however, we will measure participate baseline accuracy to confirm our  
391 sample size calculations.

392 **5.5.2 Planned Schedule of Interim Analyses**

393 Participant baseline diagnostic accuracy will be measured after 300 participants are enrolled in the  
394 study.

395 **5.5.3 Scope of Adaptations**

396 Not applicable.

397 **5.5.4 Stopping Rules**

398 Not applicable.

399 **5.5.5 Analysis Methods to Minimize Bias**

400 Not applicable.

401 **5.5.6 Adjustment of Confidence Intervals and p-values**

402 Not applicable.

403 **5.5.7 Interim Analysis for Sample Size Adjustment**

404 Once 300 participant responses are collected, we will measure participant baseline diagnostic  
405 accuracy to confirm our baseline accuracy assumption for sample size calculations. We will not  
406 measure the effects of the exposures (e.g. AI model predictions and explanations) on diagnostic  
407 accuracy during the interim analysis.

408 **5.5.8 Practical Measures to Minimize Bias**

409 The study team will conduct the interim analysis to measure baseline diagnostic accuracy and will  
410 not measure nor change any treatment effect assumptions in the power calculations.

411 **5.5.9 Documentation of Interim Analyses**

412  
413 Data and results of the interim analysis will be stored on the HIPAA aligned compute servers of the  
414 study team members.  
415

416 **5.6 Multiple Testing**

417 We do not plan to perform any corrections for multiple testing in our primary endpoint of clinical  
418 diagnostic accuracy across settings.  
419

420 **6 Summary of Study Data**

421 The tables and figures will be based upon the full population of participants who are randomized in  
422 the study and completed at least once clinical vignette. The first table will include summary statistics  
423 of all study subjects, where each column represents the two treatment arms (AI Model Alone, AI  
424 Model + Explanation). The primary statistical analysis results from generalized linear mixed models  
425 will also be reported table format, with each row corresponding to diagnostic performance in each  
426 vignette setting: Clinician Baseline, Clinician + Standard Model, Clinician + Standard Model +

Measuring the Impact of AI in the Diagnosis of Hospitalized Patients Through a Randomized Vignette-Based Multicenter Study

427 Explanation, Clinician + Systematically Biased Model, Clinician + Systematically Biased Model +  
 428 Explanation, Clinician + Clinical Consult.

429 **6.1 Subject Disposition**

430 We will track 1) how many subjects open the survey link through an email as “Opened Survey Link,”  
 431 2) how many met the inclusion criteria and consented to study participation and are “randomized,”  
 432 3) how many randomization failures occurred because of Qualtrics platform errors, 4) how many  
 433 were allocated to each treatment arm as “allocated to AI model alone” or “allocated to AI model +  
 434 explanation,” 5) how many in each arm dropped out before completing a vignette, 6) how many  
 435 completed at least one vignette and were “analyzed.”  
 436 section 9.”  
 437

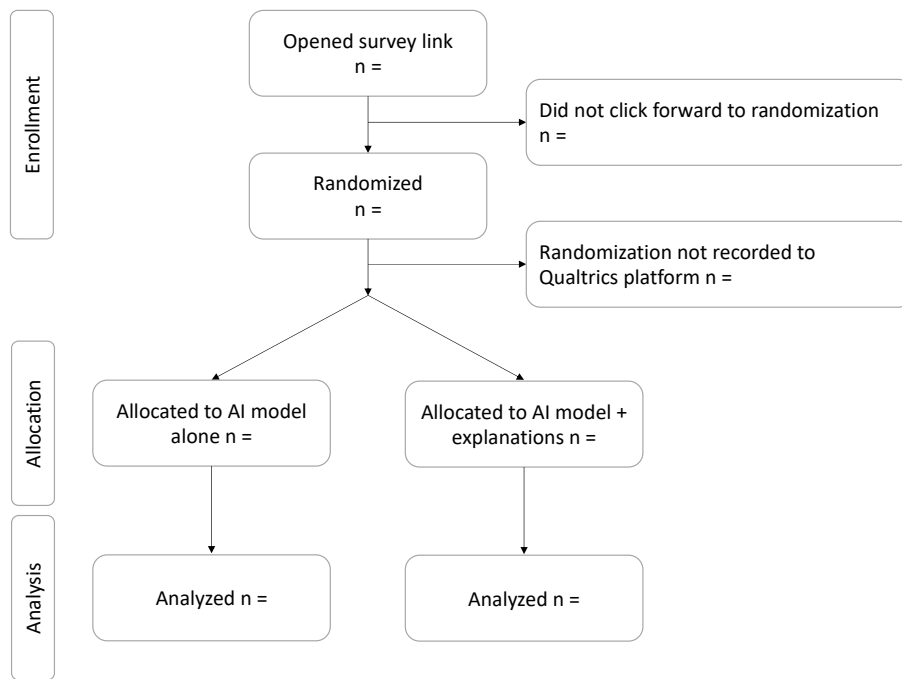

438

439 **6.2 Derived variables**

440 Participant diagnostic accuracy is the primary endpoint of this study. Their responses will be  
 441 collected on a scale of 0-100 and responses above 50 were considered positive for each diagnosis.  
 442 To calculate diagnostic accuracy, this response will be compared to the reference standard labels  
 443 generated by a group of 5 physicians who reviewed the patients complete medical record and  
 444 determined the patient’s diagnosis.

445 **6.3 Protocol Deviations**

446 We do not anticipate any major protocol deviations that would impact the analysis.

Measuring the Impact of AI in the Diagnosis of Hospitalized Patients Through a Randomized  
Vignette-Based Multicenter Study

447 **6.4 Demographic and Baseline Variables**

448 Collection of participant demographic information is optional and will occur after participants  
449 complete all vignettes. We will collect participant age, race and ethnicity, gender, the hospital  
450 setting they primarily work, their general practice area, their current role on their healthcare team,  
451 and when they completed their medical training.

452 **6.5 Concurrent Illnesses and Medical Conditions**

453 Not applicable

454 **6.6 Treatment Compliance**

455 Not applicable

456 **7 Efficacy Analyses**

457

458 **7.1 Primary Efficacy Analysis**

459 The primary outcome is the participant's diagnostic accuracy after reviewing the patient vignette.  
460 Participants will separately assess whether the patient in the vignette has pneumonia, heart failure,  
461 and COPD, and their diagnostic accuracy for each will be analyzed as a unique response within the  
462 generalized linear mixed model, with individual responses nested within study participant. To  
463 determine diagnostic accuracy, participant responses will be compared to the reference standard  
464 labels generated by a group of 5 physicians who reviewed the patients complete medical record. A  
465 generalized linear model with logit link will be fit for diagnostic accuracy with indicator variables for  
466 each of the 5 settings evaluated (clinician baseline without AI model, standard model, standard  
467 model with explanation, biased model, biased model with explanation). After fitting the model, we  
468 will specifically compare diagnostic accuracy for the following settings:

- 469 • Baseline participant accuracy with no AI prediction model input (Clinician Baseline)  
470 compared to participant accuracy with standard model predictions without explanations  
471 (Clinician + Standard Model)
- 472 • Baseline participant accuracy with no AI prediction model input (Clinician Baseline)  
473 compared to participant accuracy with standard model predictions and explanations  
474 (Clinician + Standard Model + Explanations)
- 475 • Baseline participant accuracy with no AI prediction model input (Clinician Baseline)  
476 compared to participant accuracy when systematically biased model predictions are  
477 provided without explanations (Clinician + Systematically Biased Model)
- 478 • Baseline participant accuracy with no AI prediction model input (Clinician Baseline)  
479 compared to participant accuracy when systematically biased model predictions are  
480 provided with explanations (Clinician + Systematically Biased Model + Explanations)
- 481 • Participant accuracy when systematically biased model predictions are provided without  
482 explanations (Clinician + Systematically Biased Model) compared to participant accuracy  
483 when systematically biased model predictions are provided without explanations (Clinician +  
484 Systematically Biased Model)

485 **7.2 Secondary Efficacy Analyses**

486 In a secondary analysis, we will examine how treatment decisions are influenced by correct or  
487 incorrect model predictions. We measured the percentage of time participants made an appropriate  
488 treatment decision across settings ('Clinician Baseline', 'Clinician + Model', 'Clinician + Model +

Measuring the Impact of AI in the Diagnosis of Hospitalized Patients Through a Randomized  
Vignette-Based Multicenter Study

489 Explanation') for both standard and biased AI models. Appropriate treatment for each vignette is  
490 determined based on the patients' reference diagnoses and review of the patients complete medical  
491 record. We will also investigate the effects of systematically biased estimates on the distributions of  
492 participant responses.

493 **7.2.1 Secondary Analyses of Primary Efficacy Endpoint**

494 Not applicable

495 **7.2.2 Analyses of Secondary Endpoints**

496 Not applicable

497 **7.3 Exploratory Efficacy Analyses**

498 Not applicable

499 **8 Safety Analyses**

500 Because this vignette survey study was deemed minimal risk, no safety analysis will be conducted

501 **8.1 Extent of Exposure**

502 Not applicable

503 **8.2 Adverse Events**

504 Not applicable

505 **8.3 Deaths, Serious Adverse Events and other Significant Adverse Events**

506 Not applicable

507 **8.4 Pregnancies (As applicable)**

508 No applicable

509 **8.5 Clinical Laboratory Evaluations**

510 Not applicable

511 **8.6 Prior and Concurrent Medications (As applicable)**

512 Not applicable

513 **8.7 Other Safety Measures**

514 Not applicable

515 **9 Pharmacokinetics (As Applicable)**

516 Not applicable

517

518 **10 Other Analyses**

519 Not applicable

Measuring the Impact of AI in the Diagnosis of Hospitalized Patients Through a Randomized  
Vignette-Based Multicenter Study

520 **11 Reporting Conventions**

521

522 P-values less than .001 will be reported as "p-value<.001"; P-values between .001 and .01 will be  
523 reported to the nearest thousandth. P-values greater than or equal to .01 will be reported to the  
524 nearest hundredth; P-values greater than .99 will be reported as "p-value>.99."

525 **12 Quality Assurance of Statistical Programming (As Applicable)**

526 All statistical analysis will be conducted in R by the first author team member. A second study team  
527 member will review the R code to check for correctness, while also double checking the primary  
528 analysis in Stata.

529 **13 References**

530 none

531

532
