# Supplementary material
Source: PubMed Central journal article supplement (PMC10731487)
Supplement: jama-e2322295-s004.pdf [file jama-e2322295-s004.pdf]

## Data Sharing Statement

Jabbour. Measuring the Impact of AI in the Diagnosis of Hospitalized Patients. *JAMA*.  
Published December 19, 2023. doi:10.1001/jama.2023.22295

### Data

**Data available:** Yes

**Data types:** Deidentified participant data

**How to access data:** [msjoding@umich.edu](mailto:msjoding@umich.edu)

**When available:** With publication

### Supporting Documents

**Document types:** Statistical/analytic code

**How to access documents:** [msjoding@umich.edu](mailto:msjoding@umich.edu)

**When available:** With publication

### Additional Information

**Who can access the data:** Data could be made available to other researchers from accredited research institutions after entering into a data use agreement with the University of Michigan

**Types of analyses:** Any purpose

**Mechanisms of data availability:** with a signed data access agreement
